# Supplementary material
Source: Springer Nature journal article supplement (https://www.springermedizin.de/resource/supplementary/12916_2009_226_MOESM1_ESM.pdf/9599436)
Supplement: MOESM1 [file 9599436]

**A3G binding**

**K<sub>26</sub>**

**A3F binding**

**Cul5/EloB/C  
binding**

**C<sub>114</sub>**

**C<sub>133</sub>**

**SLQYLA**

**SOCS BoX**

0

20

40

60

80

100

120

140

160

180

200
